# Supplementary material for: The Regenerative Capacity of Tissue-Engineered Amniotic Membranes
Source: ACS Appl Bio Mater. 2024 Feb 23;7(3):1441–8. doi: 10.1021/acsabm.3c00765 (PMC10951947; doi:10.1021/acsabm.3c00765)
Supplement: Supplementary file 1 — mt3c00765_si_001.pdf [file mt3c00765_si_001.pdf]

## **SUPPLEMENTARY MATERIAL**

**Title: The regenerative capacity of tissue-engineered amniotic membranes**

Authors:

Lennart Maljaars <sup>1,2</sup>, Aksel Gudde <sup>1,2</sup>, Anel Oosthuysen <sup>3</sup>, Jan-Paul Roovers <sup>1,2</sup>, Zeliha Guler <sup>1,2\*</sup>

<sup>1</sup> Department of Obstetrics and Gynecology, Amsterdam UMC location University of Amsterdam, Meibergdreef 9, 1105 AZ Amsterdam, The Netherlands

<sup>2</sup> Amsterdam Reproduction and Development research institute, Meibergdreef 9, 1105 AZ Amsterdam, The Netherlands

<sup>3</sup> Cardiovascular Research Unit, University of Cape Town, Anzio Road, Observatory 7925, Cape Town, South Africa

\*Corresponding author:

Z. Guler, Ph.D

Department of Obstetrics and Gynecology

Amsterdam Reproduction and Development

Amsterdam UMC, location AMC, University of Amsterdam

Meibergdreef 9, 1105 AZ Amsterdam, The Netherlands

Tel: +31 20 5666199

[Zeliha.guler@amsterdamumc.nl](mailto:Zeliha.guler@amsterdamumc.nl)

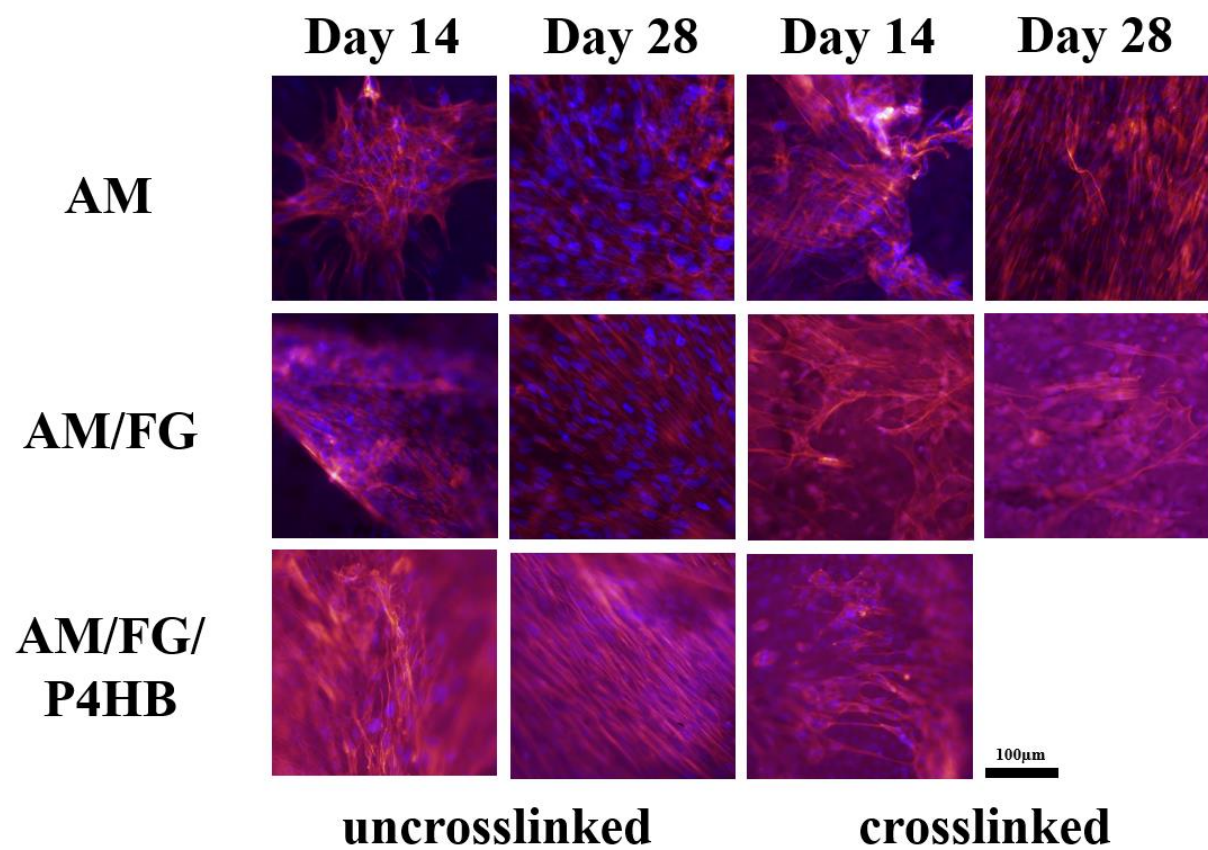

Supplementary figure 1 – Fluorescent imaging.

Immunofluorescence of vaginal fibroblast at culture day 14 and 28. crAM/FG/P4HB at day 28 was not available.

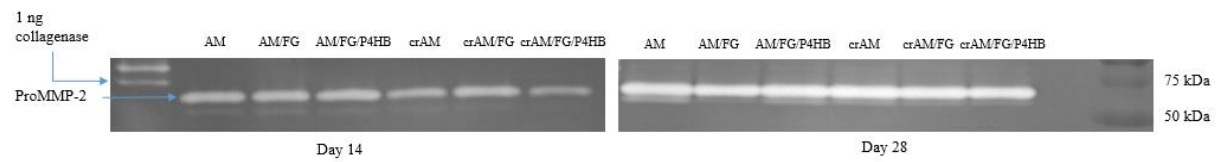

## Supplementary figure 2: Zymography.

Example of zymography gel electrophoresis of proMMP-2 activity on day 14 and 28; on the left the reference categories with protein standard and 1ng collagenase. AM: uncrosslinked amniotic membranes; AM/FG: uncrosslinked amniotic membranes with fibrin glue; AM/FG/P4HB: uncrosslinked amniotic membranes with fibrin glue and electrospun poly-4-hydroxybutyrate (P4HB); crAM: crosslinked amniotic membranes; crAM/FG: crosslinked amniotic membranes with fibrin glue; crAM/FG/P4HB: crosslinked amniotic membranes with fibrin glue and electrospun poly-4-hydroxybutyrate (P4HB).

Supplementary table 1: Mechanical characteristics

| Material                                                                                                                                                                                                                                                                                                                                                                                                                                     |       | Tensile stress at break (MPa) | Maximum elongation (%) | Tangent modulus (MPa) | Maximum load (N)   |
|----------------------------------------------------------------------------------------------------------------------------------------------------------------------------------------------------------------------------------------------------------------------------------------------------------------------------------------------------------------------------------------------------------------------------------------------|-------|-------------------------------|------------------------|-----------------------|--------------------|
| Amniotic membranes                                                                                                                                                                                                                                                                                                                                                                                                                           | dry   | 10.5 ( $\pm 3.9$ )            | 2.5 ( $\pm 1.2$ )      | 5.63 ( $\pm 2.50$ )   | 1.1 ( $\pm 0.4$ )  |
|                                                                                                                                                                                                                                                                                                                                                                                                                                              | wet   | 3.8 [2.7-10.4]                | 12.5 ( $\pm 3.4$ )     | 0.81 ( $\pm 0.57$ )   | 0.4 [0.3-1.0]      |
| P4HB (control)                                                                                                                                                                                                                                                                                                                                                                                                                               | P4-T0 | 4.5 ( $\pm 0.5$ )             | 112.3 ( $\pm 12.2$ )   | 0.31 ( $\pm 0.03$ )   | 19.1 ( $\pm 1.8$ ) |
|                                                                                                                                                                                                                                                                                                                                                                                                                                              | P4-T4 | 3.5 ( $\pm 0.8$ )             | 74.7 ( $\pm 26.1$ )    | 0.48 ( $\pm 0.05$ )   | 14.7 ( $\pm 3.5$ ) |
|                                                                                                                                                                                                                                                                                                                                                                                                                                              | P4-T8 | 3.6 ( $\pm 0.4$ )             | 64.0 ( $\pm 15.6$ )    | 0.62 ( $\pm 0.11$ )   | 16.5 ( $\pm 2.5$ ) |
| P4HB + fibrin glue                                                                                                                                                                                                                                                                                                                                                                                                                           | P4FT0 | 2.7 ( $\pm 0.3$ )             | 66.6 ( $\pm 7.2$ )     | 0.23 ( $\pm 0.02$ )   | 13.7 ( $\pm 1.4$ ) |
|                                                                                                                                                                                                                                                                                                                                                                                                                                              | P4FT4 | 1.6 ( $\pm 0.5$ )             | 24.1 ( $\pm 12.8$ )    | 0.37 [0.36-0.45]      | 6.6 ( $\pm 1.6$ )  |
|                                                                                                                                                                                                                                                                                                                                                                                                                                              | P4FT8 | 0.8 ( $\pm 0.3$ )             | 9.4 ( $\pm 2.6$ )      | 0.29 ( $\pm 0.06$ )   | 4.0 ( $\pm 1.6$ )  |
| P4HB + fibrin glue + AM                                                                                                                                                                                                                                                                                                                                                                                                                      | P4AT0 | 2.8 ( $\pm 0.2$ )             | 70.1 ( $\pm 5.6$ )     | 0.21 ( $\pm 0.02$ )   | 14.6 ( $\pm 1.2$ ) |
|                                                                                                                                                                                                                                                                                                                                                                                                                                              | P4AT4 | 2.6 ( $\pm 0.2$ )             | 59.4 ( $\pm 2.0$ )     | 0.37 ( $\pm 0.05$ )   | 12.2 ( $\pm 0.7$ ) |
|                                                                                                                                                                                                                                                                                                                                                                                                                                              | P4AT8 | 1.0 ( $\pm 0.2$ )             | 12.5 ( $\pm 2.4$ )     | 0.30 ( $\pm 0.08$ )   | 5.0 ( $\pm 0.8$ )  |
| <p>Data is reported as mean (<math>\pm</math>standard deviation) or median [25<sup>th</sup> – 75<sup>th</sup> percentile]; All samples had width of 10mm;</p> <p>AM: amniotic membrane; P4HB: poly-4-hydroxybutyrate; cxl: crosslinking experiment; P4-: P4HB control sample; P4F: P4HB with fibrin glue; P4A: P4HB with AM glued together with fibrin glue; T0: baseline measurement; T4: degradation 4 weeks; T8: degradation 8 weeks;</p> |       |                               |                        |                       |                    |

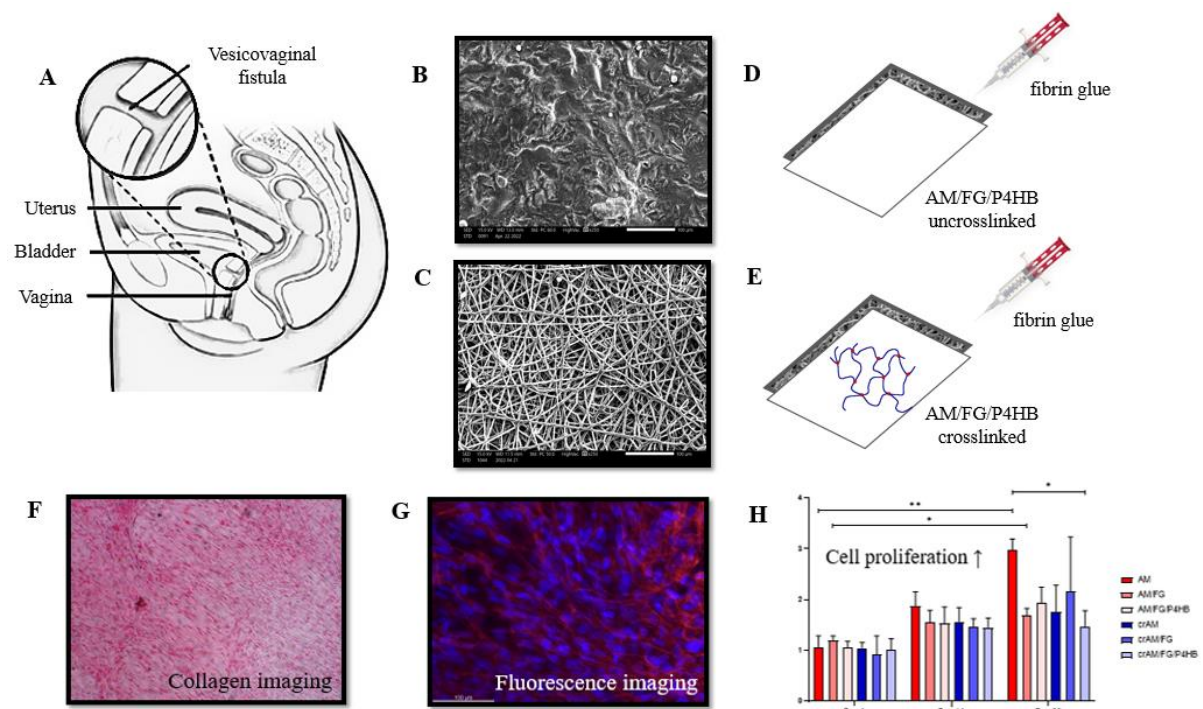

A: Schematic representation of a vesicovaginal fistula; B: Scanning electron microscopy (SEM) image of amniotic membranes at  $\times 250$ -magnification; C: SEM image of poly-4-hydroxybutyrate (P4HB) at  $\times 250$ -magnification; D: Preparation of P4HB samples: P4HB scaffold and uncrosslinked AM (white sheet) glued together with fibrin glue; E: Preparation of P4HB samples: P4HB scaffold and crosslinked AM (white sheet with crosslinking network) glued together with fibrin glue; F: Example of collagen imaging; G: Example of fluorescence imaging; H: Graph with cell proliferation data.
